# Supplementary material
Source: publisher figshare collection journal article supplement (https://tandf.figshare.com/ndownloader/files/13570496)
Supplement: Supplementary file 1 [file 13570496]

**SUPPLEMENTARY MATERIAL**

**Supplementary Table 1** – Soil analyses data of the three forest fragments used to the enrichment experiment.

| **Parameters** | **Details** | **Unit** | **Sites** | | | | | |
| --- | --- | --- | --- | --- | --- | --- | --- | --- |
| **Old-Growth Forest** | | **Abandoned *Eucalyptus* plantation with natural regeneration** | | **Secondary Forest** | |
| **0-5 cm** | **5-10 cm** | **0-5 cm** | **5-10 cm** | **0-5 cm** | **5-10 cm** |
| pH | CaCl2 |  | 5.1 | 4.9 | 5.3 | 4.8 | 6.0 | 6.2 |
| Organic matter |  | % | 6.9 | 4.6 | 6.6 | 3.4 | 6.9 | 3.7 |
| P | Resin | mg/kg | 16 | 11 | 22 | 11 | 25 | 11 |
| K |  | mg/kg | 145 | 137 | 137 | 109 | 149 | 129 |
| Ca |  | mg/kg | 1483 | 1102 | 882 | 561 | 2224 | 1483 |
| Mg |  | mg/kg | 194 | 194 | 194 | 158 | 377 | 267 |
| Al |  | mg/kg | 0 | 0 | 0 | 0 | 0 | 0 |
| CEC¹CTC |  | cmolc/kg | 15.2 | 13.3 | 9.5 | 8.2 | 16.4 | 11.9 |
| Saturation of bases |  | % | 62 | 56 | 67 | 54 | 89 | 83 |
| S SO4 |  | mg/kg | 14 | 11 | 14 | 11 | 8 | 3 |
| Cu | DTPA² | mg/kg | 1.6 | 1.7 | 1.2 | 0.9 | 1.2 | 1.2 |
| Fe | mg/kg | 80 | 70 | 104 | 118 | 50 | 60 |
| Zn | mg/kg | 4.9 | 2.9 | 4.8 | 2.7 | 9.8 | 3.8 |
| Mn | mg/kg | 64.4 | 55.2 | 35.2 | 28.8 | 40.4 | 59.6 |
| B | (hot water) | mg/kg | 1.27 | 0.9 | 0.5 | 0.36 | 0.68 | 0.35 |
| Clay |  | % | 42.0 | 47.3 | 21.4 | 23.1 | 39.3 | 44.4 |
| Silt |  | % | 18.0 | 20.7 | 14.6 | 13.9 | 45.7 | 43.6 |
| Sand |  | % | 40.0 | 32.0 | 64.0 | 63.0 | 15.0 | 12.0 |

Cation Exchange Capacity

²Diethylenetriaminepentaacetic Acid, used for extraction of micronutrients

**Supplementary Table 2 –** Vegetative structure and light transmittance in forest fragments where enrichment experiment was implemented.

|  | **Individuals/ha1;2** | **Basal Area/ha1** | **Species/ha1;2** | **Average % Light** |
| --- | --- | --- | --- | --- |
| **Old-Growth Forest** | 1191.7 | 13.9 | 70.0 | 9.4 |
| **Abandoned *Eucalyptus* plantationwith natural regeneration** | 1550.0 | 27.3 | 61.6 | 7.9 |
| **Secondary Forest** | 1133.3 | 19.0 | 57.5 | 7.2 |

1Data from Sabino, A.P.S. (unpublished data) and Mangueira, J.R.S.A. (unpublished data).

2Includes adults and regenerating tree and shrub species. Mangueira, J.R.S.A. (unpublished data).
